# Supplementary material
Source: PubMed Central journal article supplement (PMC2228358)
Supplement: cmaj_178_4_405_v2_1.pdf [file cmaj_178_4_405_v2_1.pdf]

**Appendix 1: Characteristics of provincial prescription drug plans for seniors, as of December 2006 (page 1 of 2)**

| Beneficiary group                                           | Cost-sharing strategy* |                                               |                                                                           |                                                |
|-------------------------------------------------------------|------------------------|-----------------------------------------------|---------------------------------------------------------------------------|------------------------------------------------|
|                                                             | Premium                | Deductible                                    | User copayment                                                            | Maximum annual beneficiary contribution        |
| <b>British Columbia</b>                                     |                        |                                               |                                                                           |                                                |
| Net annual household income < \$33 000                      | \$0                    | \$0                                           | 25% of prescription cost                                                  | 1.25% of net annual household income           |
| Net annual household income \$33 000-\$50 000               | \$0                    | 1% of annual household income                 | 25% of prescription cost                                                  | 2% of net annual household income              |
| Net annual household income > \$50 000                      | \$0                    | 2% of annual household income                 | 25% of prescription cost                                                  | 3% of net annual household income              |
| <b>Alberta</b>                                              | \$0                    | \$0                                           | 30% of prescription cost up to maximum of \$25 for each drug prescribed** | None                                           |
| <b>Saskatchewan</b>                                         |                        |                                               |                                                                           |                                                |
| Receiving Guaranteed Income Supplement†                     | \$0                    | \$200/senior semi-annually                    | 35% of prescription cost                                                  | None                                           |
| Not receiving Guaranteed Income Supplement                  | No coverage††          |                                               |                                                                           |                                                |
| Covered under Saskatchewan Income Plan‡                     | \$0                    | \$100/senior semi-annually                    | 35% of prescription cost                                                  | 3.4% of adjusted gross annual household income |
| <b>Manitoba</b>                                             |                        |                                               |                                                                           |                                                |
| Adjusted net annual household income ≤ \$15 000             | \$0                    | 2.56% of adjusted net annual household income | None                                                                      | 2.56% of adjusted net annual household income  |
| Adjusted net annual household income \$ > \$15 000-\$40 000 | \$0                    | 3.83% of adjusted net annual household income | None                                                                      | 3.83% adjusted net annual household income     |
| Adjusted net annual household income \$ > \$40 000-\$75 000 | \$0                    | 4.41% of adjusted net annual household income | None                                                                      | 4.41% of adjusted net annual household income  |
| Adjusted net annual household income \$ > \$75 000          | \$0                    | 5.51% of adjusted net annual household income | None                                                                      | 5.51% of adjusted net annual household income  |
| <b>Ontario</b>                                              |                        |                                               |                                                                           |                                                |
| Single                                                      |                        |                                               |                                                                           |                                                |
| Net annual household income < \$16 018                      | \$0                    | \$0                                           | \$2.00/prescription                                                       | None                                           |
| Net annual household income ≥ \$16 018                      | \$0                    | \$100/senior annually                         | \$6.11/prescription                                                       | None                                           |
| Couple                                                      |                        |                                               |                                                                           |                                                |
| Net annual household income < \$24 175                      | \$0                    | \$0                                           | \$2.00/prescription                                                       | None                                           |
| Net annual household income ≥ \$24 175                      | \$0                    | \$100/senior annually                         | \$6.11/prescription                                                       | None                                           |
| <b>Quebec</b>                                               |                        |                                               |                                                                           |                                                |
| Receiving 100% of Guaranteed Income Supplement†             | \$0                    | \$0                                           | None                                                                      | None                                           |
| Receiving 94%-99% of Guaranteed Income Supplement           | \$0-\$538‡‡            | \$8.33/month                                  | 25% of prescription cost                                                  | \$16.66/month                                  |
| Receiving ≤ 93% of Guaranteed Income Supplement             | \$0-\$538‡‡            | \$12.10/month                                 | 29% of prescription cost                                                  | \$73.42/month                                  |
| Not receiving Guaranteed Income Supplement                  | \$0-\$538‡‡            | \$12.10/month                                 | 29% of prescription cost                                                  | \$73.42/month                                  |
| <b>New Brunswick</b>                                        |                        |                                               |                                                                           |                                                |
| Receiving Guaranteed Income Supplement                      | \$0                    | \$0                                           | \$9.05/prescription                                                       | \$250                                          |
| Not receiving Guaranteed Income Supplement                  |                        |                                               |                                                                           |                                                |
| Low-income seniors¶                                         | \$0                    | \$0                                           | \$15/prescription                                                         | \$250                                          |
| Other seniors                                               | \$0                    | \$0                                           | \$15/prescription                                                         | None                                           |

*continued*

Appendix 1: Characteristics of provincial prescription drug plans for seniors, as of December 2006 (page 2 of 2)

| Beneficiary group                          | Cost-sharing strategy* |            |                                                                         |                                         |
|--------------------------------------------|------------------------|------------|-------------------------------------------------------------------------|-----------------------------------------|
|                                            | Premium                | Deductible | User copayment                                                          | Maximum annual beneficiary contribution |
| Nova Scotia                                | \$0                    | \$0        | 33%; minimum \$3/prescription, maximum \$30/prescription                | \$360/senior                            |
| Prince Edward Island                       | \$0                    | \$0        | First \$11 of the medication cost + professional fees                   | None                                    |
| <b>Newfoundland and Labrador</b>           |                        |            |                                                                         |                                         |
| Receiving Guaranteed Income Supplement     | \$0                    | \$0        | Professional fees and ingredient cost if greater than \$30/prescription | None                                    |
| Not receiving Guaranteed Income Supplement | No coverage            |            |                                                                         |                                         |

\*Premium = fixed amount that a beneficiary must pay to be eligible for the reimbursement program; deductible = fixed amount or percentage of income that constitutes the first portion of the costs that must be borne by the beneficiary before the insurer shares payment; copayment = fixed amount, percentage of the prescription cost or percentage of income that is not reimbursed by the insurer but must be borne by the beneficiary; maximum annual beneficiary contribution = maximum amount a beneficiary will have to pay in a given year.

†To be eligible for Guaranteed Income Supplement, a single senior must earn < \$14 472/year, a couple of seniors both receiving old age security pension must earn < \$19 008/year, and the spouse of a nonpensioner must earn < \$34 848/year. Annual income excludes the Old Age Security Pension.

‡Special program for lower income seniors. Seniors receiving full Guaranteed Income Supplement receive full Saskatchewan Income Plan benefits.

§Total gross income less \$3000 for the spouse and each dependant child under 18 years of age.

¶Those who do not collect Guaranteed Income Supplement but have an annual household income < \$17 198 if single, < \$26 955 if in a couple and < \$32 390 if married to a nonpensioner.

\*\*Plus additional cost for some higher-cost products.

††Families can be eligible for the Special Support Program.

‡‡Premium varies with income.
