# Supplementary material
Source: PubMed Central journal article supplement (PMC2228358)
Supplement: cmaj_178_4_405_v2_3.pdf [file cmaj_178_4_405_v2_3.pdf]

**Appendix 3: Characteristics of provincial prescription drug plans for recipients of social assistance, as of December 2006**

| Province                  | Cost-sharing strategy* |                |                                                                         |                                  |
|---------------------------|------------------------|----------------|-------------------------------------------------------------------------|----------------------------------|
|                           | Premium                | Deductible     | User copayment                                                          | Maximum beneficiary contribution |
| British Columbia          | Full coverage          |                |                                                                         |                                  |
| Alberta                   | Full coverage          |                |                                                                         |                                  |
| Saskatchewan              | \$0                    | \$0            | \$2/perscription                                                        | None                             |
| Manitoba                  | Full coverage          |                |                                                                         |                                  |
| Ontario                   | \$0                    | \$0            | \$2/perscription                                                        | None                             |
| Quebec                    | \$0                    | \$8.33 monthly | 25% of perscription cost                                                | \$16.66 monthly                  |
| New Brunswick             | \$0                    | \$0            | Adults: \$4/perscription<br>Children (< 18 years old): \$2/perscription | \$250/family annually            |
| Nova Scotia               | \$0                    | \$0            | \$5/perscription                                                        | None                             |
| Prince Edward Island      | Full coverage          |                |                                                                         |                                  |
| Newfoundland and Labrador | Full coverage          |                |                                                                         |                                  |

\*Premium = fixed amount that a beneficiary must pay to be eligible for the reimbursement program; deductible = fixed amount or percentage of income that constitutes the first portion of the costs that must be borne by the beneficiary before the insurer shares payment; copayment = fixed amount, percentage of the prescription cost or percentage of income that is not reimbursed by the insurer but must be borne by the beneficiary; maximum annual beneficiary contribution = maximum amount a beneficiary will have to pay in a given year.
