# Supplementary material
Source: PubMed Central journal article supplement (PMC2228358)
Supplement: cmaj_178_4_405_v2_4.pdf [file cmaj_178_4_405_v2_4.pdf]

**Appendix 4: Sixteen clinical scenarios showing variations by province in the proportion of annual prescription drug costs paid by seniors, nonseniors and recipients of social assistance**

| Category;<br>income level                  | Age,<br>yr | Married | Annual family<br>income, \$ | GIS | OAS | No. of<br>children | Annual cost of<br>prescription<br>drugs, \$ | Province; % of costs paid by patient |            |            |            |            |            |            |            |      |      |      |
|--------------------------------------------|------------|---------|-----------------------------|-----|-----|--------------------|---------------------------------------------|--------------------------------------|------------|------------|------------|------------|------------|------------|------------|------|------|------|
|                                            |            |         |                             |     |     |                    |                                             | BC                                   | Alta       | Sask       | Man        | Ont        | Que        | NB         | NS         | PEI  | NL   |      |
| <b>Senior</b>                              |            |         |                             |     |     |                    |                                             |                                      |            |            |            |            |            |            |            |      |      |      |
| Below national<br>average                  | 71         | No      | 13 138                      | Yes | Yes | —                  | 260                                         | ≤ 35                                 | > 35-< 100 | 100        | 100        | ≤ 35       | > 35-< 100 | ≤ 35       | > 35-< 100 | ≤ 35 | ≤ 35 |      |
|                                            |            |         |                             |     |     |                    | 1000                                        | ≤ 35                                 | > 35-< 100 | > 35-< 100 | > 35-< 100 | ≤ 35       | > 35-< 100 | ≤ 35       | ≤ 35       | ≤ 35 | ≤ 35 |      |
|                                            | 65         | Yes     | 23 315                      | Yes | Yes | —                  | 260                                         | ≤ 35                                 | > 35-< 100 | 100        | 100        | ≤ 35       | > 35-< 100 | ≤ 35       | > 35-< 100 | ≤ 35 | ≤ 35 |      |
|                                            |            |         |                             |     |     |                    | 1000                                        | ≤ 35                                 | > 35-< 100 | > 35-< 100 | > 35-< 100 | ≤ 35       | > 35-< 100 | ≤ 35       | ≤ 35       | ≤ 35 | ≤ 35 |      |
| At national<br>average                     | 66         | No      | 23 903                      | No  | Yes | —                  | 260                                         | ≤ 35                                 | > 35-< 100 | 100        | 100        | > 35-< 100 | > 100*     | ≤ 35       | > 35-< 100 | ≤ 35 | 100  |      |
|                                            |            |         |                             |     |     |                    | 1000                                        | ≤ 35                                 | > 35-< 100 | > 35-< 100 | > 35-< 100 | ≤ 35       | > 35-< 100 | ≤ 35       | ≤ 35       | ≤ 35 | 100  |      |
|                                            | 72         | Yes     | 44 806                      | No  | Yes | —                  | 260                                         | > 35-< 100                           | > 35-< 100 | 100        | 100        | > 35-< 100 | > 100*     | ≤ 35       | > 35-< 100 | ≤ 35 | 100  |      |
|                                            |            |         |                             |     |     |                    | 1000                                        | > 35-< 100                           | > 35-< 100 | 100        | 100        | ≤ 35       | > 35-< 100 | ≤ 35       | ≤ 35       | ≤ 35 | 100  |      |
| Above national<br>average                  | 80         | No      | 53 903                      | No  | Yes | —                  | 260                                         | 100                                  | > 35-< 100 | 100        | 100        | > 35-< 100 | > 100*     | ≤ 35       | > 35-< 100 | ≤ 35 | 100  |      |
|                                            |            |         |                             |     |     |                    | 1000                                        | 100                                  | > 35-< 100 | 100        | 100        | ≤ 35       | > 35-< 100 | ≤ 35       | ≤ 35       | ≤ 35 | 100  |      |
|                                            | 69         | Yes     | 71 806                      | No  | Yes | —                  | 260                                         | 100                                  | > 35-< 100 | 100        | 100        | > 35-< 100 | > 100*     | ≤ 35       | > 35-< 100 | ≤ 35 | 100  |      |
|                                            |            |         |                             |     |     |                    | 1000                                        | 100                                  | > 35-< 100 | 100        | 100        | ≤ 35       | > 35-< 100 | ≤ 35       | ≤ 35       | ≤ 35 | 100  |      |
| <b>Nonsenior</b>                           |            |         |                             |     |     |                    |                                             |                                      |            |            |            |            |            |            |            |      |      |      |
| Below national<br>average                  | 23         | No      | 14 000                      | —   | —   | 1                  | 260                                         | > 35-< 100                           | > 35-< 100 | > 35-< 100 | 100        | 100        | > 35-< 100 | 100        | 100        | ≤ 35 | 100  |      |
|                                            |            |         |                             |     |     |                    | 1000                                        | ≤ 35                                 | > 35-< 100 | > 35-< 100 | > 35-< 100 | > 35-< 100 | > 35-< 100 | > 35-< 100 | 100        | 100  | ≤ 35 | 100  |
|                                            | 27         | No      | 17 000                      | —   | —   | 0                  | 260                                         | > 35-< 100                           | > 35-< 100 | > 35-< 100 | 100        | 100        | > 100*     | 100        | 100        | 100  | 100  |      |
|                                            |            |         |                             |     |     |                    | 1000                                        | > 35-< 100                           | > 35-< 100 | > 35-< 100 | > 35-< 100 | > 35-< 100 | > 35-< 100 | > 35-< 100 | 100        | 100  | 100  | 100  |
|                                            | 59         | Yes     | 38 000                      | —   | —   | 2                  | 260                                         | 100                                  | 100        | 100        | 100        | 100        | > 100*     | 100        | 100        | 100  | 100  |      |
|                                            |            |         |                             |     |     |                    | 1000                                        | 100                                  | > 35-< 100 | 100        | > 35-< 100 | 100        | > 35-< 100 | 100        | 100        | 100  | 100  | 100  |
| At national<br>average                     | 60         | No      | 28 000                      | —   | —   | 0                  | 260                                         | 100                                  | > 35-< 100 | 100        | 100        | 100        | > 100*     | 100        | 100        | 100  | 100  |      |
|                                            |            |         |                             |     |     |                    | 1000                                        | 100                                  | > 35-< 100 | 100        | > 35-< 100 | > 35-< 100 | > 35-< 100 | 100        | 100        | 100  | 100  | 100  |
|                                            | 42         | No      | 31 000                      | —   | —   | 1                  | 260                                         | 100                                  | > 35-< 100 | 100        | 100        | 100        | > 100*     | 100        | 100        | 100  | 100  |      |
|                                            |            |         |                             |     |     |                    | 1000                                        | 100                                  | > 35-< 100 | 100        | > 35-< 100 | > 35-< 100 | > 35-< 100 | 100        | 100        | 100  | 100  | 100  |
|                                            | 59         | Yes     | 59 000                      | —   | —   | 2                  | 260                                         | 100                                  | 100        | 100        | 100        | 100        | > 100*     | 100        | 100        | 100  | 100  |      |
|                                            |            |         |                             |     |     |                    | 1000                                        | 100                                  | > 35-< 100 | 100        | 100        | 100        | > 35-< 100 | 100        | 100        | 100  | 100  | 100  |
| Above national<br>average                  | 46         | No      | 60 000                      | —   | —   | 2                  | 260                                         | 100                                  | > 35-< 100 | 100        | 100        | 100        | > 100*     | 100        | 100        | 100  | 100  |      |
|                                            |            |         |                             |     |     |                    | 1000                                        | 100                                  | > 35-< 100 | 100        | 100        | 100        | > 35-< 100 | 100        | 100        | 100  | 100  | 100  |
|                                            | 34         | No      | 80 000                      | —   | —   | 0                  | 260                                         | 100                                  | > 35-< 100 | 100        | 100        | 100        | > 100*     | 100        | 100        | 100  | 100  |      |
|                                            |            |         |                             |     |     |                    | 1000                                        | 100                                  | > 35-< 100 | 100        | 100        | 100        | > 35-< 100 | 100        | 100        | 100  | 100  | 100  |
|                                            | 57         | Yes     | 120 000                     | —   | —   | 1                  | 260                                         | 100                                  | 100        | 100        | 100        | 100        | > 100*     | 100        | 100        | 100  | 100  |      |
|                                            |            |         |                             |     |     |                    | 1000                                        | 100                                  | > 35-< 100 | 100        | 100        | 100        | > 35-< 100 | 100        | 100        | 100  | 100  | 100  |
| <b>Social<br/>assistance<br/>recipient</b> | 40         | No      | Social<br>assistance        | —   | —   | 0                  | 260                                         | ≤ 35                                 | ≤ 35       | ≤ 35       | ≤ 35       | ≤ 35       | > 35-< 100 | ≤ 35       | ≤ 35       | ≤ 35 | ≤ 35 |      |
|                                            |            |         |                             |     |     |                    | 1000                                        | ≤ 35                                 | ≤ 35       | ≤ 35       | ≤ 35       | ≤ 35       | ≤ 35       | ≤ 35       | ≤ 35       | ≤ 35 | ≤ 35 | ≤ 35 |

Note: GIS = Guaranteed Income Supplement, OAS = Old Age Security.  
\*User cost exceeds cost of drugs.
